# Supplementary material for: Ductile keratin films from deep eutectic solvent-fractionated feathers
Source: Royal Society of Chemistry journal article supplement (doi:10.1039/d1ra05123g), 2021-01-01
Supplement: d1ra05123g1.pdf [file d1ra05123g1.pdf]

## Electronic supplementary information (ESI)

### Ductile keratin films from deep eutectic solvent-fractionated feathers

Authors: Emmi-Maria Nuutinen\*<sup>†</sup>, Tommi Virtanen<sup>†</sup>, Raija Lantto<sup>†</sup>, Mika Vähä-Nissi<sup>†</sup>, Anna-Stiina Jääskeläinen<sup>†,‡</sup>

<sup>†</sup> Solutions for Natural Resources and Environment, VTT, Technical Research Centre of Finland, Tietotie 2, FI-02044, Espoo, Finland

<sup>‡</sup> Present address: Kemira Oyj, R&D and Technology, Luoteisrinne 2, 02270, Espoo, Finland

\*Corresponding author: E-mail: [emmi.nuutinen@vtt.fi](mailto:emmi.nuutinen@vtt.fi). Telephone: +358406817126.

### 3.1 Deep eutectic solvent fractionation and film preparation

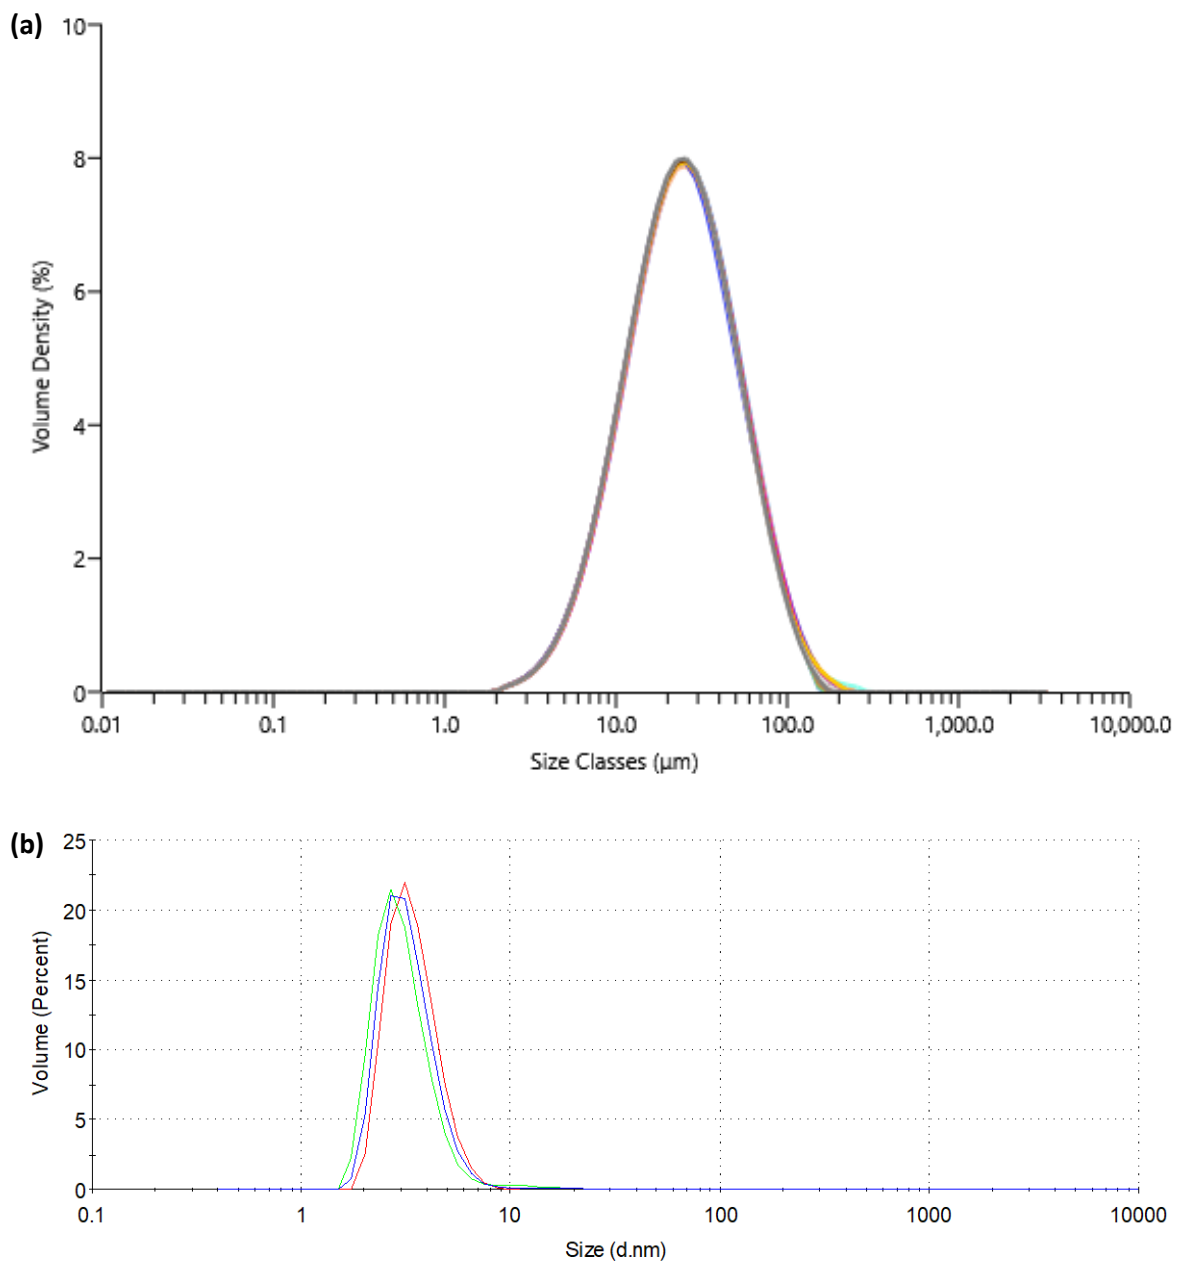

**Fig. S1** Mean particle sizes of the (a) high and (b) low Mw keratin fractions.

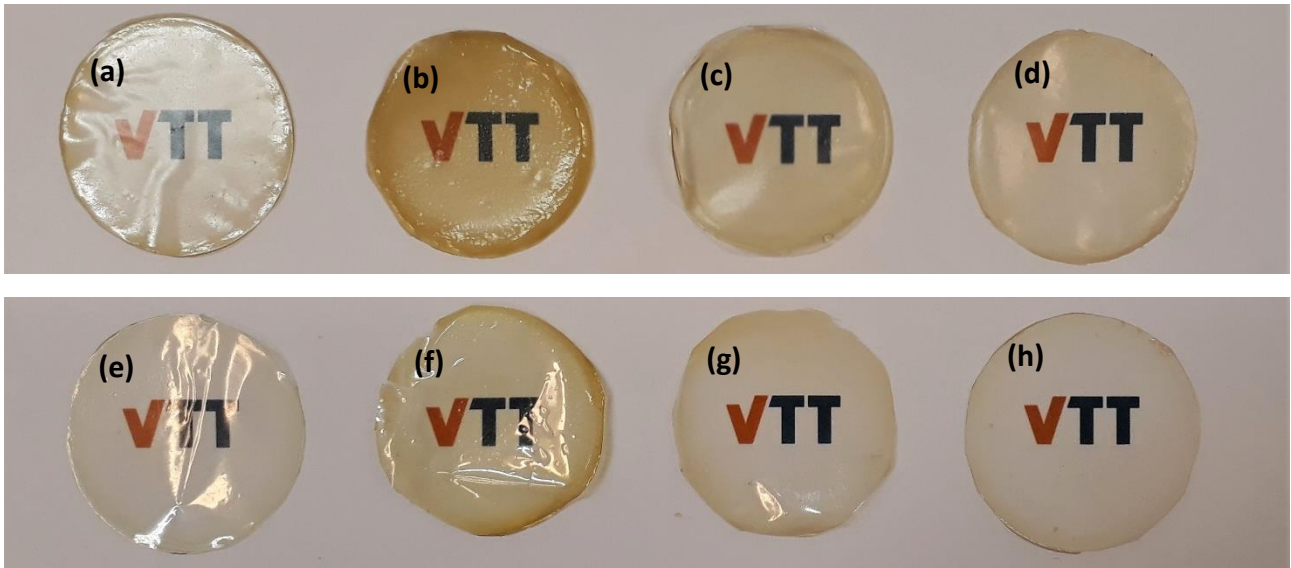

**Fig. S2** Glycerol plasticised keratin films made of (a) high and (e) low Mw keratin fractions and which are cross-linked with glutaraldehyde at (b,f) pH 9 and (c,g) 12 as well as with (d,h) 1,4-Butanediol diglycidyl ether at pH 9.5.

### 3.2.1 Film morphology

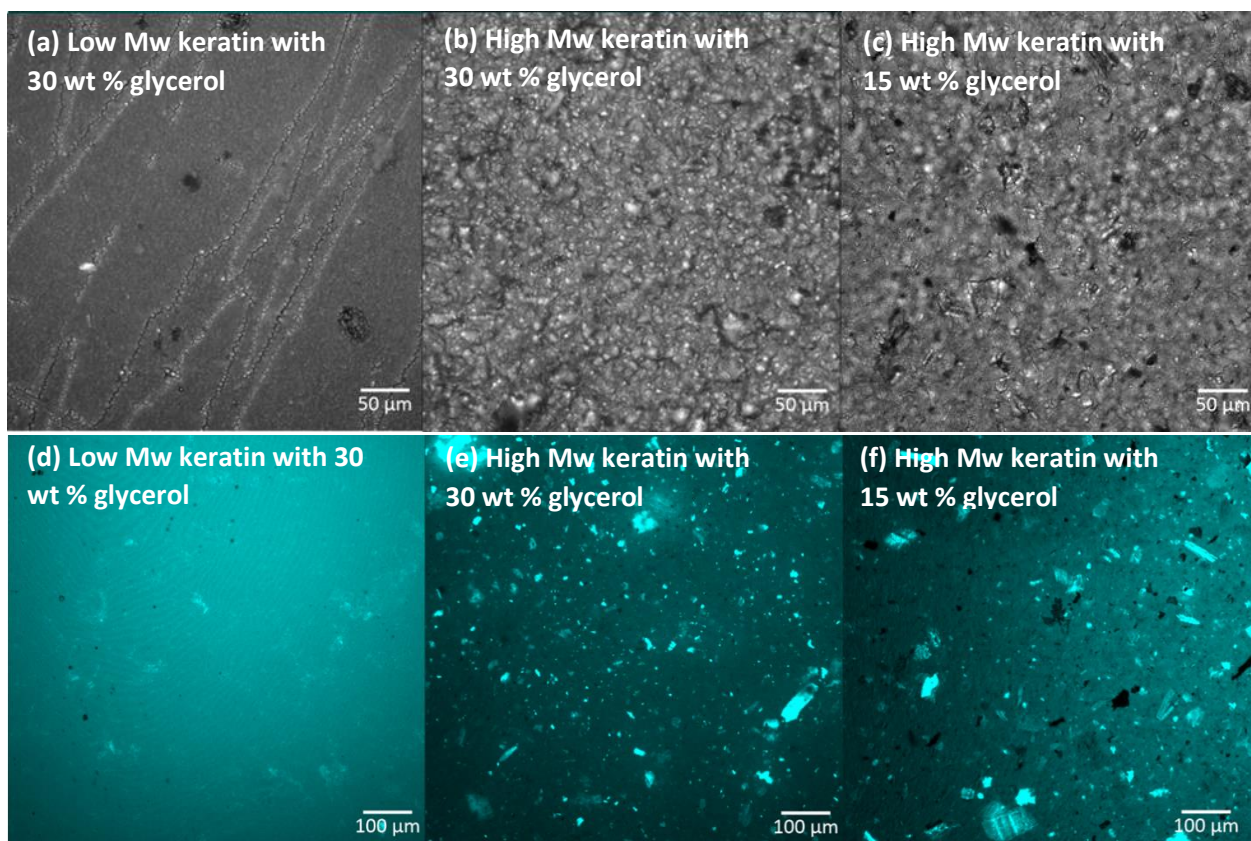

**Fig. S3** Optical microscopy images of the glycerol plasticised keratin films from the surface (a-c) and permeable imaging (d-f). The films are made of the low and high Mw keratin fractions and plasticised with glycerol.

### 3.2.2 Molecular structure

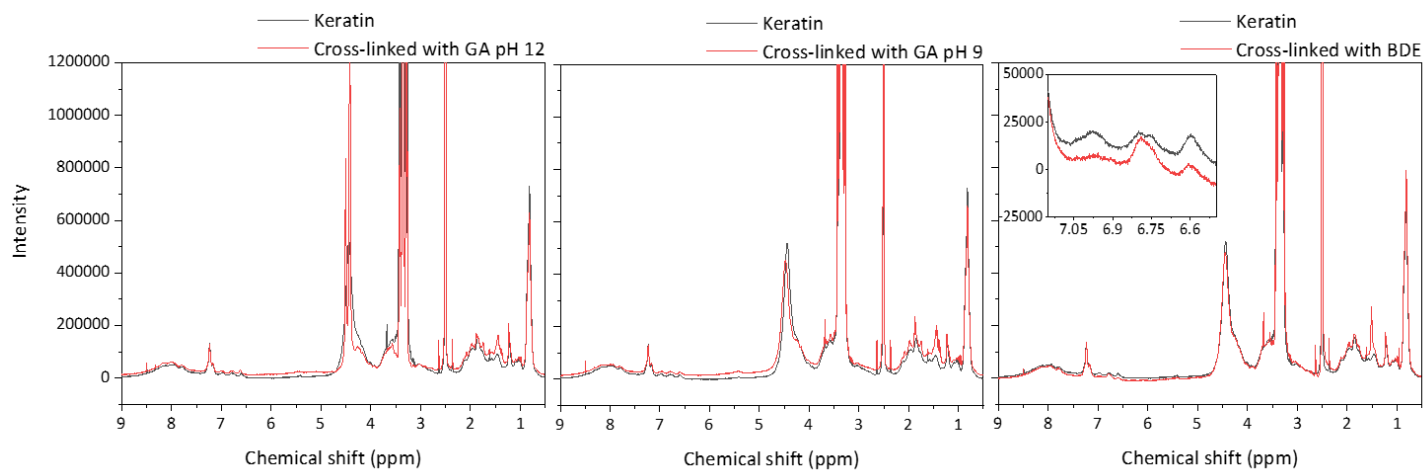

**Fig. S4** <sup>1</sup>H-NMR spectra of the low Mw keratin fraction, the films made of this fraction and plasticised with 30 wt% glycerol concentration and cross-linked with glutaraldehyde (GA) at pH 12 and 9 as well as with 1,4-butanediol diglycidyl ether (BDE) at pH 9.5.

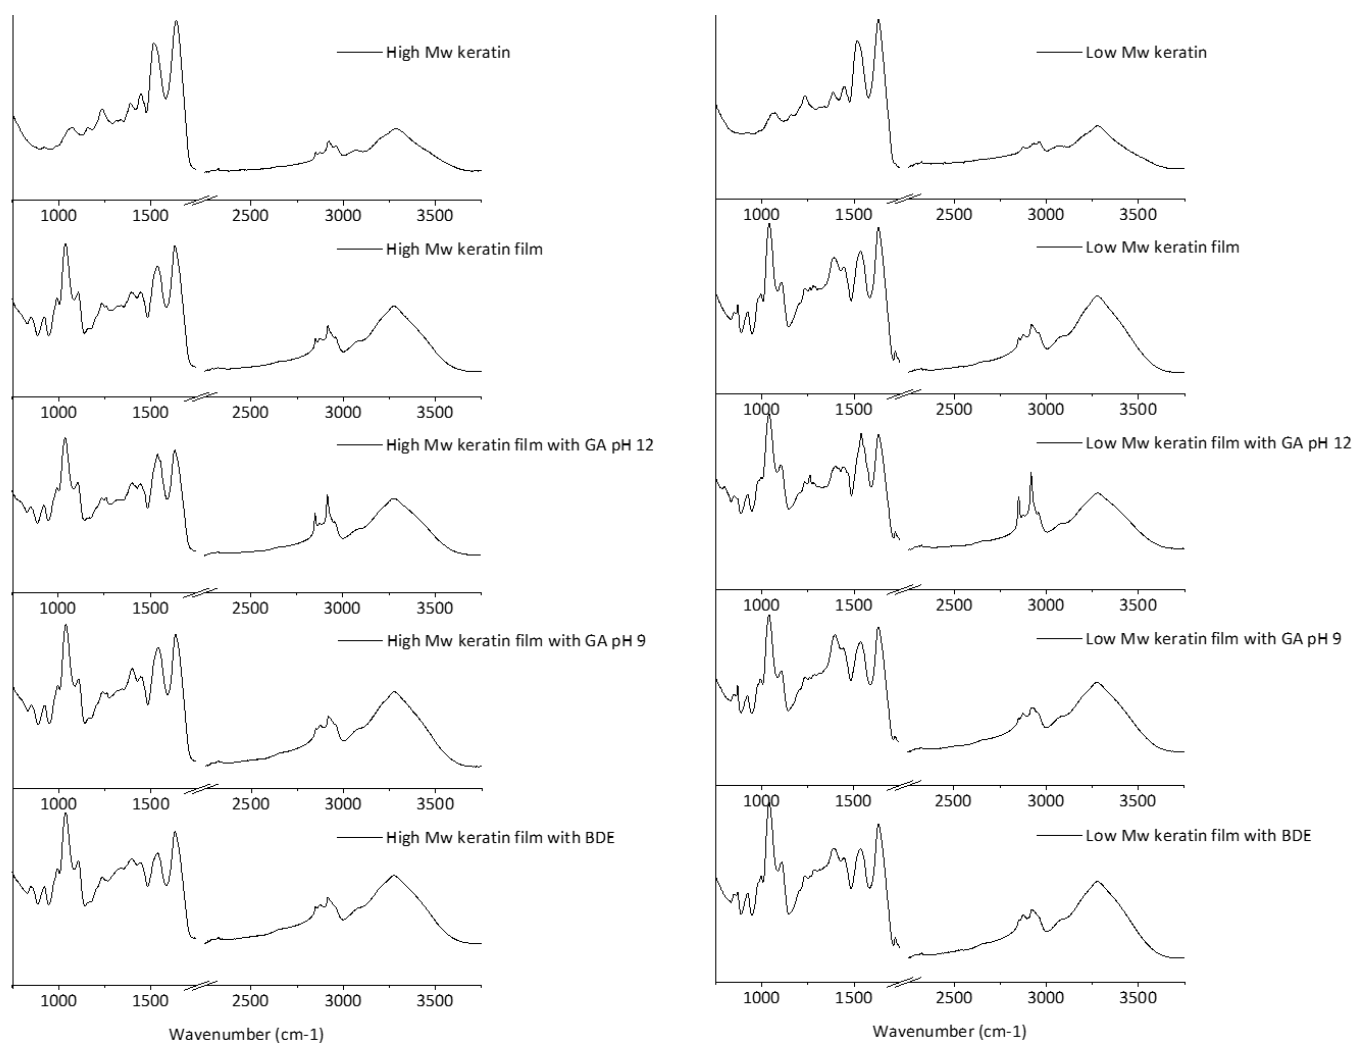

**Fig. S5** ATR-FTIR spectra of the high and low Mw keratin fractions, the films made of these fractions and plasticised with 30 wt% glycerol concentration and cross-linked with glutar aldehyde (GA) at pH 12 and 9 as well as with 1,4-butanediol diglycidyl ether (BDE) at pH 9.5.

### 3.2.3 Mechanical properties

(a)

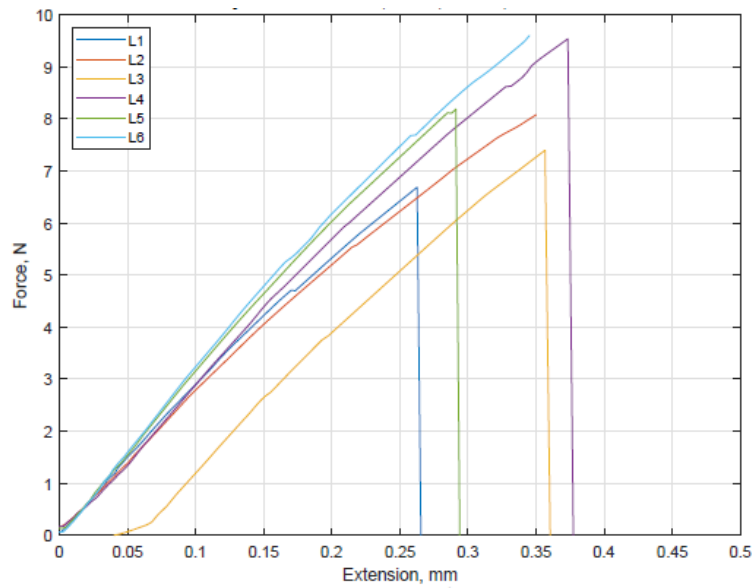

|     | Thickness (mm) | Young's Modulus (MPa) | Tensile Strength (MPa) | Load at Maximum Load (N) | Extension at Maximum Load (mm) | Load at Break (N) | Extension at Break (mm) | Stress at Break (MPa) | Strain at Break | Stiffness (N/m) | Work to Break (Nm) |
|-----|----------------|-----------------------|------------------------|--------------------------|--------------------------------|-------------------|-------------------------|-----------------------|-----------------|-----------------|--------------------|
| Ave | 65,8           | 649                   | 8,39                   | 8,28                     | 0,33                           | 8,28              | 0,33                    | 8,39                  | 0,0166          | 32008           | 1,45               |
| STD | 4,7            | 29                    | 0,95                   | 1,06                     | 0,04                           | 1,06              | 0,04                    | 0,95                  | 0,0020          | 2183            | 0,34               |

Treg Speed 2 mm/min, strip width 15 mm, gauge 20 mm, load cell 100 N

(b)

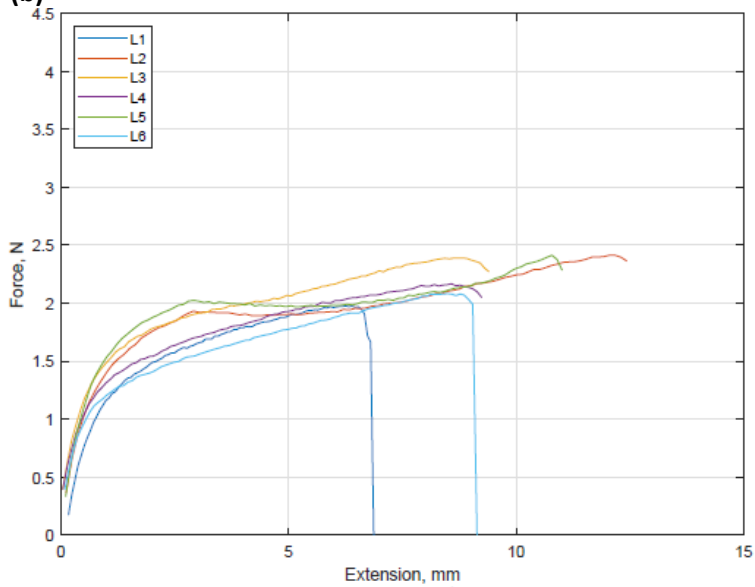

|     | Thickness (mm) | Young's Modulus (MPa) | Tensile Strength (MPa) | Load at Maximum Load (N) | Extension at Maximum Load (mm) | Load at Break (N) | Extension at Break (mm) | Stress at Break (MPa) | Strain at Break | Stiffness (N/m) | Work to Break (Nm) |
|-----|----------------|-----------------------|------------------------|--------------------------|--------------------------------|-------------------|-------------------------|-----------------------|-----------------|-----------------|--------------------|
| Ave | 52,7           | 98                    | 2,85                   | 2,25                     | 9,14                           | 1,99              | 9,74                    | 2,53                  | 0,4874          | 3798            | 18,11              |
| STD | 3,9            | 25                    | 0,21                   | 0,17                     | 1,90                           | 0,21              | 1,80                    | 0,28                  | 0,0898          | 744             | 4,39               |

Treg Speed 2 mm/min, strip width 15 mm, gauge 20 mm, load cell 100 N

**Fig. S6** Example of stress-strain curves of the keratin films prepared from the high Mw keratin fraction and plasticised with (a) 15 wt% and (b) 30 wt% glycerol concentrations.
